# Supplementary material for: New Insights into the Metabolism of the Flavanones Eriocitrin and Hesperidin: A Comparative Human Pharmacokinetic Study
Source: PubMed Central journal article supplement (PMC8000041; doi:10.3390/antiox10030435), 2021-03-11
Supplement: antioxidants-10-00435-s001.pdf [file antioxidants-10-00435-s001.pdf]

## SUPPLEMENTARY MATERIAL

### **New Insights into the Metabolism of the Flavanones Eriocitrin and Hesperidin: A Comparative Human Pharmacokinetic Study**

*María Ángeles Ávila-Gálvez, Juan Antonio Giménez-Bastida, Antonio González-Sarrias and Juan Carlos Espín\**

Laboratory of Food & Health, Research Group on Quality, Safety and Bioactivity of Plant Foods, CEBAS-CSIC, 30100 Campus de Espinardo, Murcia, Spain.

Correspondence:

\*Address correspondence to J.C. Espín, Laboratory of Food & Health; Research Group on Quality, Safety and Bioactivity of Plant Foods; CEBAS-CSIC, 30100 Campus de Espinardo, Murcia, Spain. E-mail: [jcespin@cebas.csic.es](mailto:jcespin@cebas.csic.es); Phone: +34-968-396200, Ext: 6344

**Table S1.** Markers associated with inflammation and oxidative stress.

| <b>Compounds</b>                        | <b>Abbreviation</b>                       | <b>Molecular formula</b>                                        | <b><i>m/z</i></b> |
|-----------------------------------------|-------------------------------------------|-----------------------------------------------------------------|-------------------|
| 8-Oxo-2'-deoxyguanosine                 | 8-OHdG                                    | C <sub>10</sub> H <sub>13</sub> N <sub>5</sub> O <sub>5</sub>   | 282.0844          |
| 13-Oxo-9,11-octadecadienoic acid        | 13-oxo-ODE                                | C <sub>18</sub> H <sub>30</sub> O <sub>3</sub>                  | 293.2100          |
| 13-Hydroxy-9,11-octadecadienoic acid    | 13-HODE                                   | C <sub>18</sub> H <sub>32</sub> O <sub>3</sub>                  | 295.2279          |
| 9-Hydroxy-10,12-octadecadienoic acid    | 9-HODE                                    | C <sub>18</sub> H <sub>32</sub> O <sub>3</sub>                  | 295.2279          |
| 12,13-Dihydroxy-9Z-octadecenoic acid    | 12(13)-DiHOME                             | C <sub>18</sub> H <sub>34</sub> O <sub>4</sub>                  | 313.2400          |
| 9,10-Dihydroxy-12Z-octadecenoic acid    | 9(10)-DiHOME                              | C <sub>18</sub> H <sub>34</sub> O <sub>4</sub>                  | 313.2400          |
| 12-Hydroxyeicosapentaenoic acid         | 12-HEPE                                   | C <sub>20</sub> H <sub>30</sub> O <sub>3</sub>                  | 317.2122          |
| 15-Oxo-Eicosatetraenoic acid            | 15-oxo-ETE                                | C <sub>20</sub> H <sub>30</sub> O <sub>3</sub>                  | 317.2122          |
| 12-Oxo-Eicosatetraenoic acid            | 12-oxo-ETE                                | C <sub>20</sub> H <sub>30</sub> O <sub>3</sub>                  | 317.2122          |
| 20-Hydroxyeicosatetraenoic acid         | 20-HETE                                   | C <sub>20</sub> H <sub>32</sub> O <sub>3</sub>                  | 319.2279          |
| 15-Hydroxyeicosatetraenoic acid         | 15-HETE                                   | C <sub>20</sub> H <sub>32</sub> O <sub>3</sub>                  | 319.2279          |
| 12-Hydroxyeicosatetraenoic acid         | 12-HETE                                   | C <sub>20</sub> H <sub>32</sub> O <sub>3</sub>                  | 319.2279          |
| 11-Hydroxyeicosatetraenoic acid         | 11-HETE                                   | C <sub>20</sub> H <sub>32</sub> O <sub>3</sub>                  | 319.2279          |
| 9-Hydroxyeicosatetraenoic acid          | 9-HETE                                    | C <sub>20</sub> H <sub>32</sub> O <sub>3</sub>                  | 319.2279          |
| 8-Hydroxyeicosatetraenoic acid          | 8-HETE                                    | C <sub>20</sub> H <sub>32</sub> O <sub>3</sub>                  | 319.2279          |
| 5-Hydroxyeicosatetraenoic acid          | 5-HETE                                    | C <sub>20</sub> H <sub>32</sub> O <sub>3</sub>                  | 319.2279          |
| 15-Hydroxy-8,11,13-eicosatrienoic acid  | 15-HETrE                                  | C <sub>20</sub> H <sub>34</sub> O <sub>3</sub>                  | 321.2435          |
| Prostaglandin M                         | PGM                                       | C <sub>16</sub> H <sub>24</sub> O <sub>7</sub>                  | 327.1449          |
| 9,12,13-Trihydroxy-10-octadecenoic acid | 9,12,13-(TriHOME)                         | C <sub>18</sub> H <sub>34</sub> O <sub>5</sub>                  | 329.2333          |
| 9,10,13-Trihydroxy-11-octadecenoic acid | 9,10,13-(TriHOME)                         | C <sub>18</sub> H <sub>34</sub> O <sub>5</sub>                  | 329.2333          |
| Leukotrien B4                           | LTB <sub>4</sub>                          | C <sub>20</sub> H <sub>32</sub> O <sub>4</sub>                  | 335.2228          |
| 14,15-Dihydroxyeicosatrienoic Acid      | 14,15-DHET                                | C <sub>20</sub> H <sub>34</sub> O <sub>4</sub>                  | 337.2400          |
| 11,12-Dihydroxyeicosatrienoic Acid      | 11,12-DHET                                | C <sub>20</sub> H <sub>34</sub> O <sub>4</sub>                  | 337.2400          |
| 8,9-Dihydroxyeicosatrienoic Acid        | 8,9-DHET                                  | C <sub>20</sub> H <sub>34</sub> O <sub>4</sub>                  | 337.2400          |
| 5,6-Dihydroxyeicosatrienoic Acid        | 5,6-DHET                                  | C <sub>20</sub> H <sub>34</sub> O <sub>4</sub>                  | 337.2400          |
| 17-Hydroxydocosaheptaenoic acid         | 17-HDoHE                                  | C <sub>22</sub> H <sub>32</sub> O <sub>3</sub>                  | 343.2300          |
| 15-Keto-prostaglandin E2                | 15-keto-PGE2                              | C <sub>20</sub> H <sub>30</sub> O <sub>5</sub>                  | 349.2020          |
| Prostaglandin E2                        | PGE2                                      | C <sub>20</sub> H <sub>32</sub> O <sub>5</sub>                  | 351.2177          |
| Prostaglandin D2                        | PGD2                                      | C <sub>20</sub> H <sub>32</sub> O <sub>5</sub>                  | 351.2177          |
| 8-Iso-prostaglandin F2 $\alpha$         | 8-iso-PGF <sub>2<math>\alpha</math></sub> | C <sub>20</sub> H <sub>34</sub> O <sub>5</sub>                  | 353.2333          |
| Prostaglandin E2-D4                     | PGE2-d4                                   | C <sub>20</sub> H <sub>28</sub> D <sub>4</sub> O <sub>5</sub>   | 355.2428          |
| Thromboxane B2                          | TXB <sub>2</sub>                          | C <sub>20</sub> H <sub>34</sub> O <sub>6</sub>                  | 369.2283          |
| Thromboxane B2-D4                       | TXB <sub>2</sub> -d4                      | C <sub>20</sub> H <sub>30</sub> D <sub>4</sub> O <sub>6</sub>   | 373.2534          |
| Resolvin D2                             | Rv-D2                                     | C <sub>22</sub> H <sub>32</sub> O <sub>5</sub>                  | 375.2177          |
| Resolvin D1                             | Rv-D1                                     | C <sub>22</sub> H <sub>32</sub> O <sub>5</sub>                  | 375.2177          |
| Hemiketal E2                            | HKE2                                      | C <sub>20</sub> H <sub>32</sub> O <sub>8</sub>                  | 399.2024          |
| Hemiketal D2                            | HKD2                                      | C <sub>20</sub> H <sub>32</sub> O <sub>8</sub>                  | 399.2024          |
| Leukotriene C4                          | LTC4                                      | C <sub>30</sub> H <sub>47</sub> N <sub>3</sub> O <sub>9</sub> S | 624.296           |

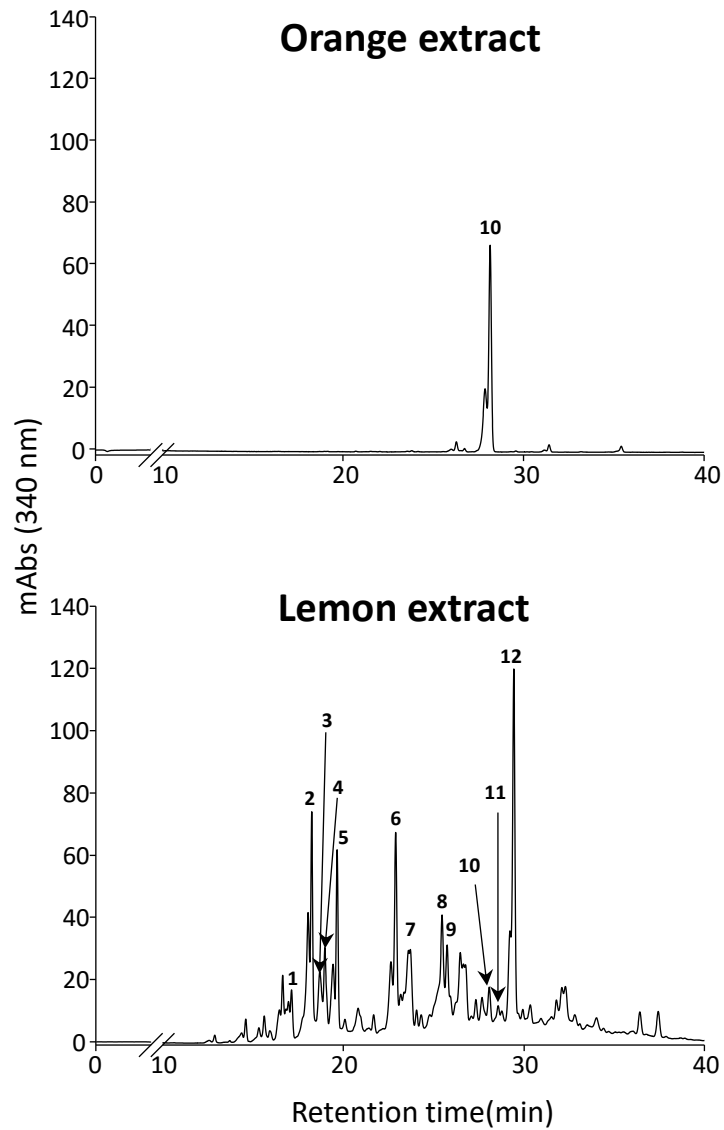

**Figure S1.** Chromatograms of lemon and orange extracts at 340 nm using HPLC-UV-MS/MS (IT). The numbers designate the compounds according to Table 2.

**Table S2.** Differences between postprandial and baseline values after consuming a high-fat-high-sugar meal and citrus extracts.

|                                 | Citrus extracts consumption |          |                            |          |
|---------------------------------|-----------------------------|----------|----------------------------|----------|
|                                 | Lemon                       | <i>P</i> | Orange                     | <i>P</i> |
|                                 | Change (%) (post-baseline)  |          | Change (%) (post-baseline) |          |
| Glucose (mg/dL)                 | 15.0                        | 0.071    | 9.3                        | 0.202    |
| Total cholesterol (mg/dL)       | -1.2%                       | 0.220    | 0.9                        | 0.391    |
| HDL-cholesterol (mg/dL)         | 0.9                         | 0.770    | 0                          | 1.000    |
| LDL-cholesterol (mg/dL)         | -7.4*                       | 0.005    | -4.9*                      | 0.004    |
| Triglycerides (mg/dL)           | 36.0*                       | < 0.001  | 40.8*                      | < 0.001  |
| Insulin (μU/mL)                 | 833*                        | < 0.001  | 1,237*                     | < 0.001  |
| HOMA-IR                         | 1,036*                      | < 0.001  | 1,414*                     | < 0.001  |
| GGT (U/mL)                      | -1.3                        | 0.486    | -0.7                       | 0.873    |
| ALT (U/mL)                      | 0                           | 1.000    | 0.5                        | 0.849    |
| Diastolic blood pressure (mmHg) | 0.6                         | 0.637    | -1.7                       | 0.243    |
| Systolic blood pressure (mmHg)  | 2.0                         | 0.135    | 4.6*                       | 0.026    |
| Heart rate (bpm)                | 21.2*                       | < 0.001  | 22.5*                      | < 0.001  |

Values are shown as the difference (%) between postprandial (post) and baseline values after consuming a high-fat-high-sugar meal. \*Significant difference. HOMA-IR, homeostatic model assessment for insulin resistance; GGT, gamma-glutamyl transferase; ALT, alanine aminotransferase.

**Table S3.** Oxylipins tentatively identified in plasma using UPLC-ESI-QTOF-MS.

| <b>Compounds</b>  | <b>TR</b> | <b><i>m/z</i> experimental</b> | <b>Molecular formula</b>                       | <b>Error (ppm)</b> | <b>Score</b> |
|-------------------|-----------|--------------------------------|------------------------------------------------|--------------------|--------------|
| 9,12,13-(TriHOME) | 11,89     | 329.2331                       | C <sub>18</sub> H <sub>34</sub> O <sub>5</sub> | 0.73               | 99.12        |
| 9,10,13-(TriHOME) | 13,15     | 329.2331                       | C <sub>18</sub> H <sub>34</sub> O <sub>5</sub> | 0.85               | 99.33        |
| 12(13)-DiHOME     | 16,14     | 313.2390                       | C <sub>18</sub> H <sub>34</sub> O <sub>4</sub> | -1.50              | 98.70        |
| 9(10)-DiHOME      | 16,39     | 313.2383                       | C <sub>18</sub> H <sub>34</sub> O <sub>4</sub> | 0.49               | 99.04        |
| 13-oxo-ODE        | 17,91     | 293.2117                       | C <sub>18</sub> H <sub>30</sub> O <sub>3</sub> | 0.72               | 95.33        |
| 13-HODE           | 17,98     | 295.2278                       | C <sub>18</sub> H <sub>32</sub> O <sub>3</sub> | -0.24              | 98.26        |
| 9-HODE            | 18,20     | 295.2274                       | C <sub>18</sub> H <sub>32</sub> O <sub>3</sub> | 1.49               | 98.08        |

**Table S4.** Peak integration area values from the EICs of the identified plasma oxylipins.

| <b>Compounds</b>  | <b>LE-baseline</b>          | <b>LE-post (1 h)</b>           | <b>OE-baseline</b>            | <b>OE-post (1 h)</b>           |
|-------------------|-----------------------------|--------------------------------|-------------------------------|--------------------------------|
| 9,12,13-(TriHOME) | (215±125) x 10 <sup>3</sup> | (753±1,006) x·10 <sup>3*</sup> | (221±113) x·10 <sup>3</sup>   | (557±344) x·10 <sup>3***</sup> |
| 9,10,13-(TriHOME) | (83±127) x·10 <sup>3</sup>  | (64±197) x·10 <sup>3</sup>     | (64±36) x·10 <sup>3</sup>     | (110±127) x·10 <sup>3</sup>    |
| 12(13)-DiHOME     | (959±435) x·10 <sup>3</sup> | (1,334±797) x·10 <sup>3*</sup> | (1,080±809) x·10 <sup>3</sup> | (1,295±893) x·10 <sup>3*</sup> |
| 9(10)-DiHOME      | (814±328) x·10 <sup>3</sup> | (1,209±515) x·10 <sup>3*</sup> | (937±818) x·10 <sup>3</sup>   | (1,222±704) x·10 <sup>3*</sup> |
| 13-oxo-ODE        | (705±358) x·10 <sup>3</sup> | (964±691) x·10 <sup>3</sup>    | (640±209) x·10 <sup>3</sup>   | (782±319) x·10 <sup>3</sup>    |
| 13-HODE           | (83±199) x·10 <sup>3</sup>  | (87±203) x·10 <sup>3</sup>     | (113±202) x·10 <sup>3</sup>   | (138±250) x·10 <sup>3</sup>    |
| 9-HODE            | (393±156) x·10 <sup>3</sup> | (453±269) x·10 <sup>3</sup>    | (374±178) x·10 <sup>3</sup>   | (357±139) x·10 <sup>3</sup>    |

Values are shown as mean±SD. \*Significant differences between postprandial (1-hour post meal) and baseline values, after consuming a high-fat-high-sugar meal (\* $P$ <0.05; \*\*\* $P$ <0.001); LE, lemon extract; OE, orange extract.

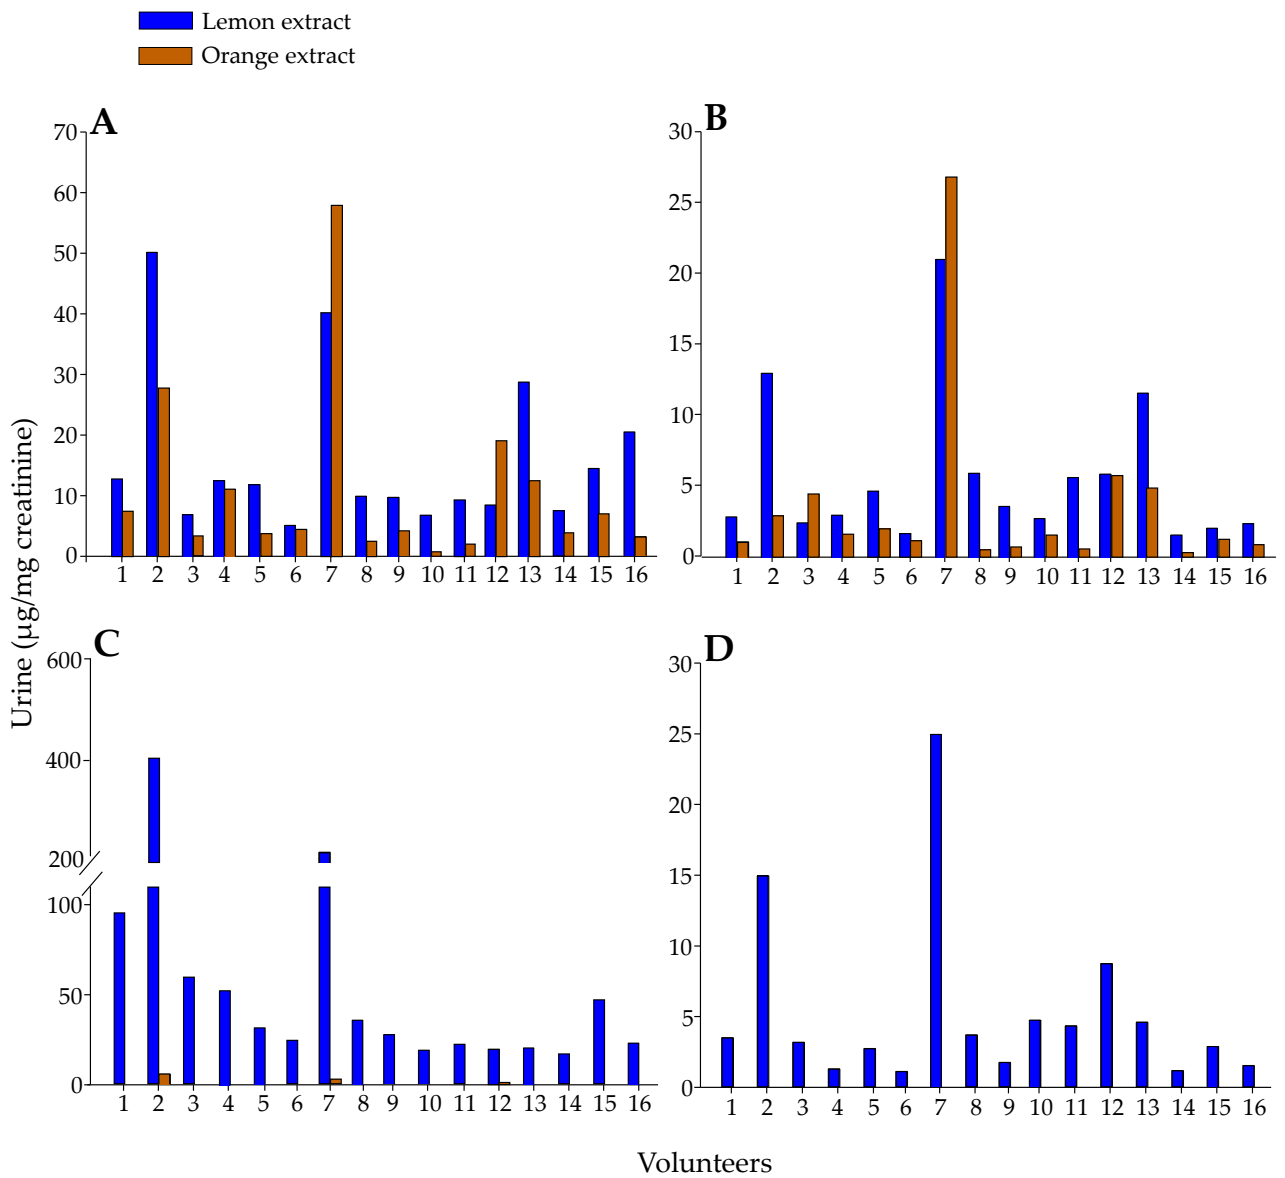

**Figure S2.** Total metabolite excretion (sum of urine fractions F1, F2, F3 and F4) of **M8**, **M14**, **M6** and **M10** after consuming lemon or orange extracts. (A) **M8** (hesperetin 3'-O-glucuronide); (B) **M14** (hesperetin 3'-O-sulfate); (C) **M6** (homoeriodictyol glucuronide); and (D) **M10** (homoeriodictyol sulfate). Blue bars, lemon extract; brown bars, orange extract (hesperidin).

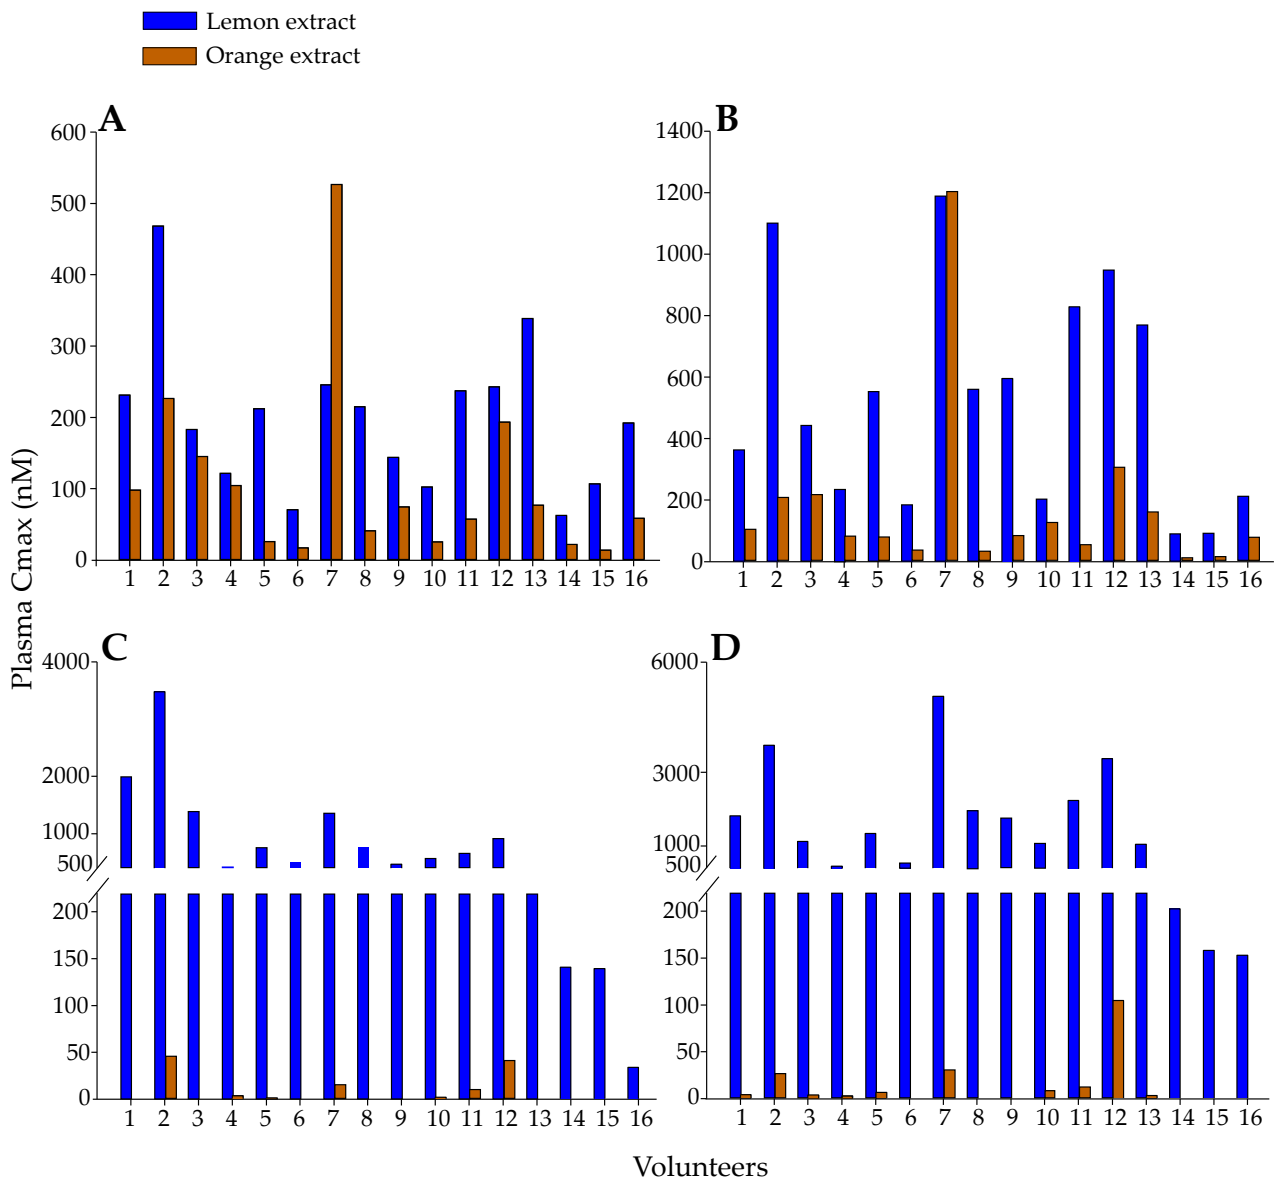

**Figure S3.** Maximum plasma concentration ( $C_{max}$ ) of **M8**, **M14**, **M2**, and **M13** after lemon or orange extracts intake. **(A)**  $C_{max}$  values of **M8** (hesperetin 3'-O-glucuronide); **(B)**  $C_{max}$  values of **M14** (hesperetin 3'-O-sulfate); **(C)**  $C_{max}$  values of **M2** (eriodictyol glucuronide-2); and **(D)**  $C_{max}$  values of **M13** (eriodictyol sulfate). Blue bars, lemon extract; brown bars, orange extract (hesperidin).



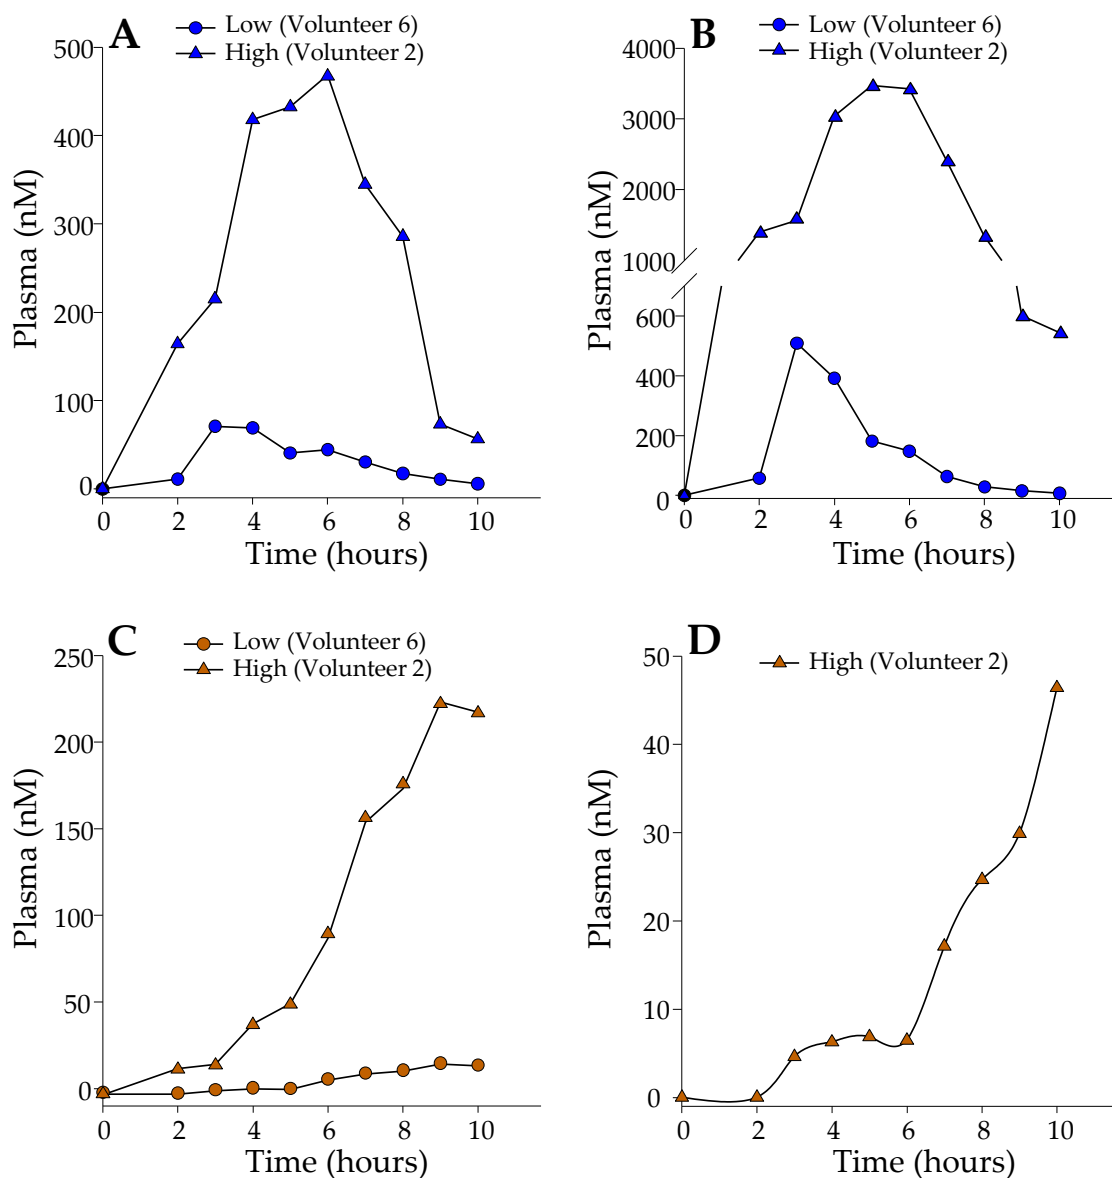

**Figure S4.** Interindividual differences between low and high metabolite producers in the pharmacokinetics of M8 and M2. (A, C) M8 (hesperetin 3'-O-glucuronide), and (B, D) M2 (eriodictyol glucuronide-2), after consuming lemon (blue) or orange (brown) extracts. Circle, low producer; triangle, high producer.
